# Supplementary material for: Mitochondrial fission regulates germ cell differentiation by suppressing ROS-mediated activation of Epidermal Growth Factor Signaling in the Drosophila larval testis
Source: PubMed Central journal article supplement (PMC6927965; doi:10.1038/s41598-019-55728-0), 2019-12-23

**Mitochondrial fission regulates germ cell differentiation by suppressing ROS-mediated activation of Epidermal Growth Factor Signaling in the *Drosophila* larval testis**

Rafael Sênos Demarco<sup>1</sup> & D. Leanne Jones<sup>1,2,3</sup>

<sup>1</sup>Department of Molecular, Cell and Developmental Biology, <sup>2</sup>Molecular Biology Institute, <sup>3</sup>Eli and Edythe Broad Center of Regenerative Medicine and Stem Cell Research, University of California, Los Angeles, Los Angeles, CA 90095, USA

## Supplemental Figure Legends

### **Figure S1. Depletion or inhibition of Drp1 results in hyperfused mitochondria**

**A-C.** Representative images (>20 samples acquired from 3 biological replicates) of testes from 1do animals expressing GFP<sup>mito</sup> in GSCs and early spermatogonia under the driver *nanosGAL4:VP16*. Mitochondrial fission was inhibited by expression of *Drp1<sup>DN</sup>* (B) or *Drp1<sup>RNAi</sup>* (C). Full genotypes: (A) *w<sup>1118</sup>/Y; UAS-GFP<sup>mito</sup>/+; nosGAL4:VP16/+* (B) *w<sup>1118</sup>/Y; UAS-GFP<sup>mito</sup>/+; nosGAL4:VP16/UAS-Drp1<sup>DN</sup>* (C) *w<sup>1118</sup>/Y; UAS-GFP<sup>mito</sup>/+; nosGAL4:VP16/UAS-Drp1<sup>RNAi</sup>*. Asterisk (\*) represents the hub; scale bar, 20µm.

### **Figure S2. JNK activation did not contribute to the GSC loss caused by inhibition of Drp1.**

**A.** Images of testes from animals harboring the *MMP1-lacZ* transgene, a readout for the activation of the JNK pathway. Note the somatic activation of MMP1 in *nanosGAL4:VP16>Drp1<sup>DN</sup>* animals.

**B.** Representation of the percentage of testes with at least one GSC present at the niche/no GSC present in 1do animals. Number of testes analyzed in each category displayed on the graph in white. Two-sided Fisher's exact test used. In B, asterisk (\*) represents the hub; scale bar, 20µm. Individual images representative of >20 samples acquired from 3 biological replicates.

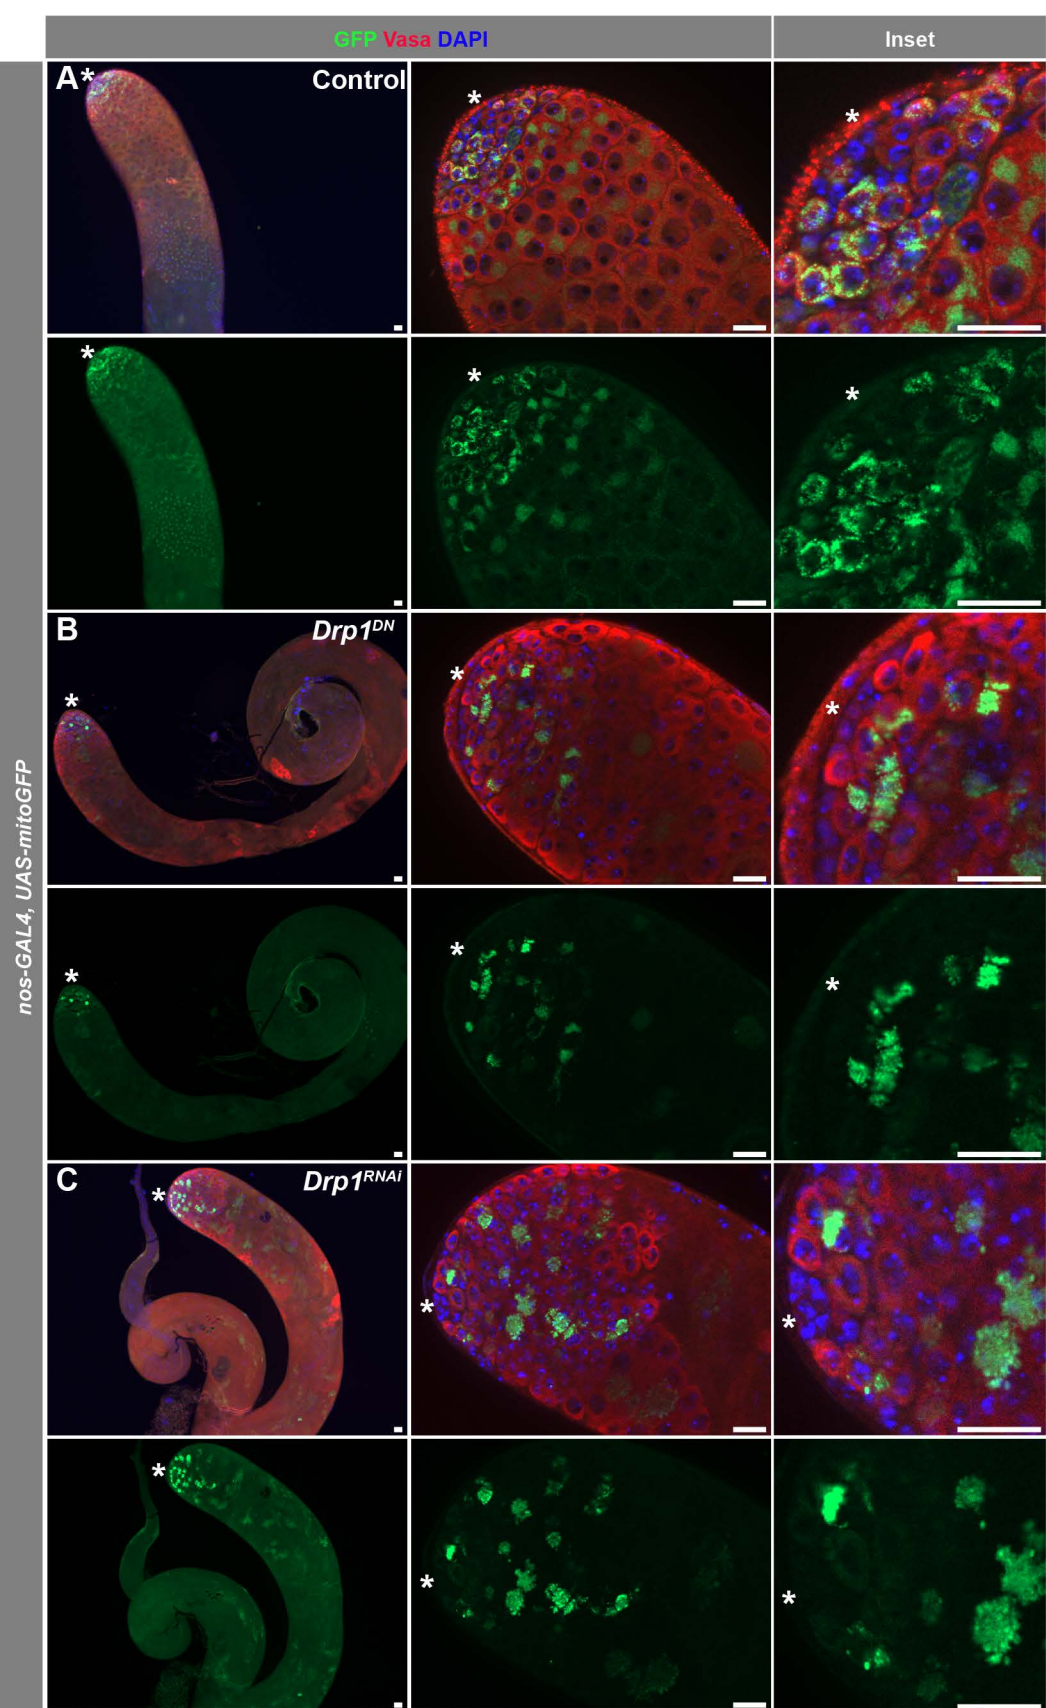

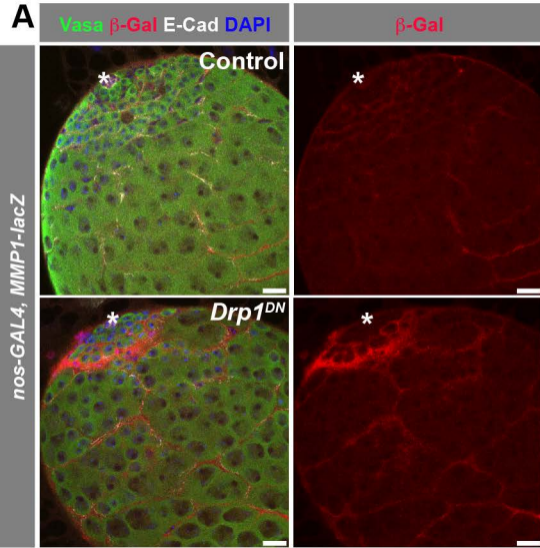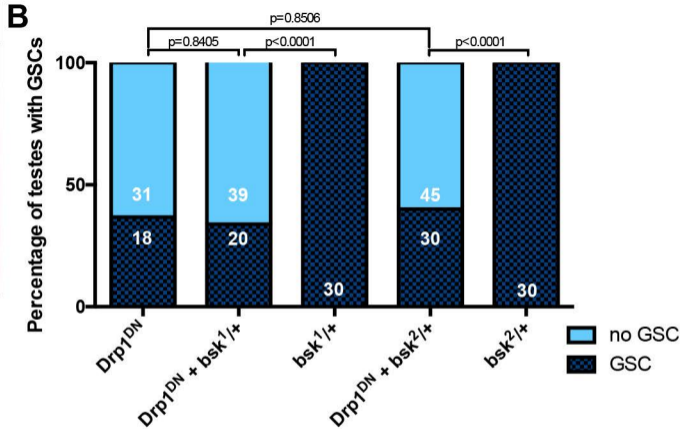

Supplement: 41598_2019_55728_MOESM1_ESM.pdf [file 41598_2019_55728_MOESM1_ESM.pdf]
